# Supplementary material for: Colorectal cancer at high risk of peritoneal metastases: long term outcomes of a pilot study on adjuvant laparoscopic HIPEC and future perspectives
Source: PubMed Central journal article supplement (PMC5584242; doi:10.18632/oncotarget.17158), 2017-04-17
Supplement: oncotarget-08-51200-s001.pdf [file oncotarget-08-51200-s001.pdf]

# Colorectal cancer at high risk of peritoneal metastases; long term outcomes of a pilot study on adjuvant laparoscopic HIPEC and future perspectives

## SUPPLEMENTARY MATERIALS

### SUPPLEMENTARY FIGURE

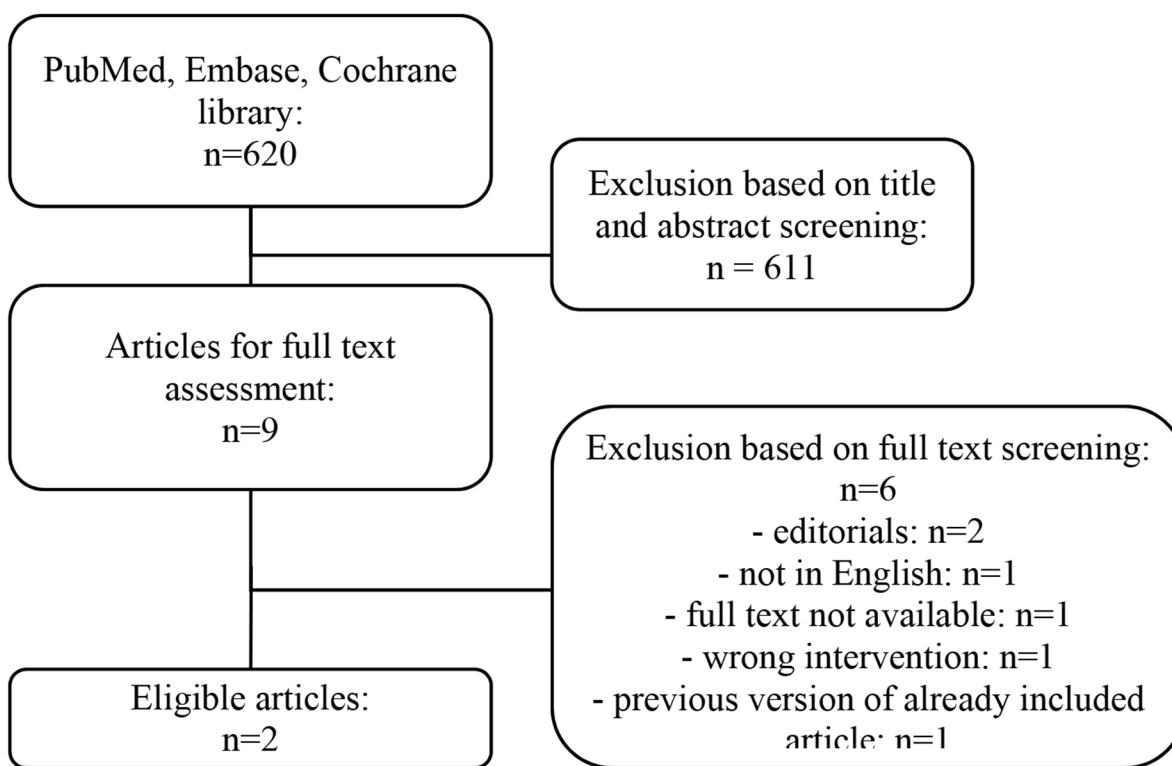

Supplementary Figure 1: Flow chart of search results from August 2013–November 2016.
